# Supplementary material for: Estimations of Fe0/−1–N2interaction energies of iron(0)-dicarbene and its reduced analogue by EDA-NOCV analyses: crucial steps in dinitrogen activation under mild conditions
Source: Royal Society of Chemistry journal article supplement (doi:10.1039/d1ra08348a), 2022-01-01
Supplement: d1ra08348a1.pdf [file d1ra08348a1.pdf]

## Supporting Information

# Estimations of Fe<sup>0/-1</sup>-N<sub>2</sub> Interaction Energies of Iron(0)-Dicarbene and its Reduced Analogue by EDA-NOCV Analyses: Crucial Steps in Dinitrogen Activation Under Mild Condition

Sai Manoj N. V. T. Gorantla,<sup>[a]</sup> and Kartik Chandra Mondal <sup>\*[a]</sup>

[a] Department of Chemistry, Indian Institute of Technology Madras, Chennai 600036, India. **E-mail:** [csdkartik@iitm.ac.in](mailto:csdkartik@iitm.ac.in)

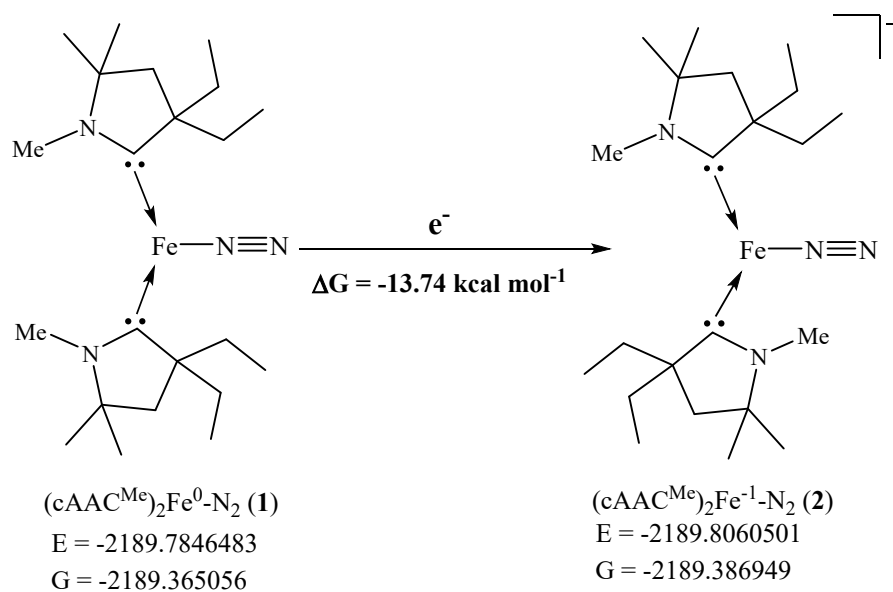

**Scheme S1.** The energetics of the reduction of complex **1** to form complex **2** calculated at BP86-D3(BJ)/Def2TZVPP level.  $\Delta E/\Delta G \text{ kcal mol}^{-1} = \Delta E/\Delta G \text{ Hatree} * 627.51$ .

**$\Delta G$  calculation for electron affinity:**

$$-2189.386949 + 2189.365056 = -0.021893 \text{ hatree} * 627.51 = -13.74 \text{ kcal mol}^{-1}$$

**Table S1.** The EDA-NOCV results at the BP86-D3(BJ)/TZ2P level of (cAAC)<sub>2</sub>Fe–N<sub>2</sub> bonds of complex **1** in gas phase and in solvent diethyl ether using neutral (cAAC)<sub>2</sub>Fe in electronic triplet state and neutral N<sub>2</sub> fragment electronic singlet state as interacting fragments. Energies are in kcal mol<sup>-1</sup>.

| Complex <b>1</b> | Fragments                    | $\Delta E_{\text{int}}$ | $\Delta E_{\text{pauli}}$ | $\Delta E_{\text{elec}}$ | $\Delta E_{\text{dis}}$ | $\Delta E_{\text{orb}}$ |
|------------------|------------------------------|-------------------------|---------------------------|--------------------------|-------------------------|-------------------------|
| Gas              | (cAAC) <sub>2</sub> Fe (T) + | -87.9                   | 190.2                     | -111.9                   | -5.2                    | -161.0                  |
|                  | [N <sub>2</sub> ] (S)        |                         |                           |                          |                         |                         |
| Solvent          | (cAAC) <sub>2</sub> Fe (T) + | -87.5                   | 189.2                     | -112.0                   | -5.1                    | -159.7                  |
|                  | [N <sub>2</sub> ] (S)        |                         |                           |                          |                         |                         |

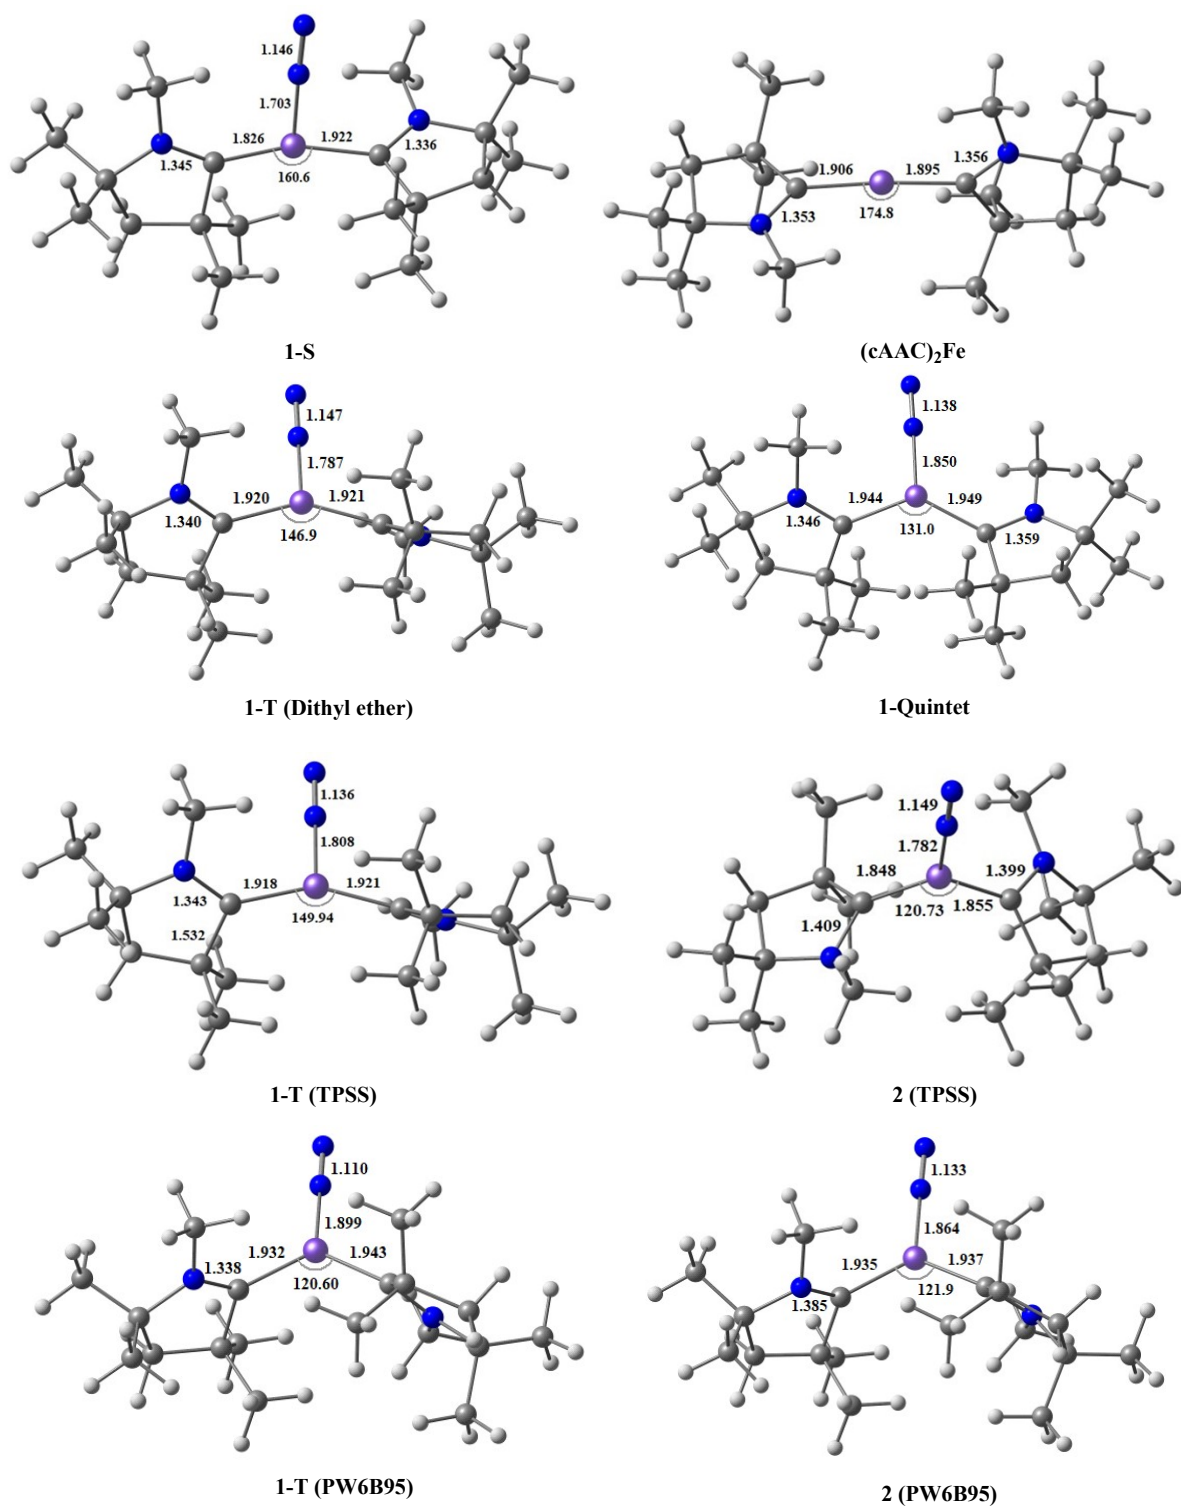

**Figure S1.** Optimized geometries of neutral singlet complex **1-S**, **1-T (Diethyl ether)**, **1-Quintet**, neutral triplet (cAAC)<sub>2</sub>Fe ligand at BP86-D3(BJ)/Def2TZVPP level and complexes **1-T** and **2** at TPSS-D3(BJ)/Def2TZVPP and PW6B95(D3)/Def2TZVPP levels.

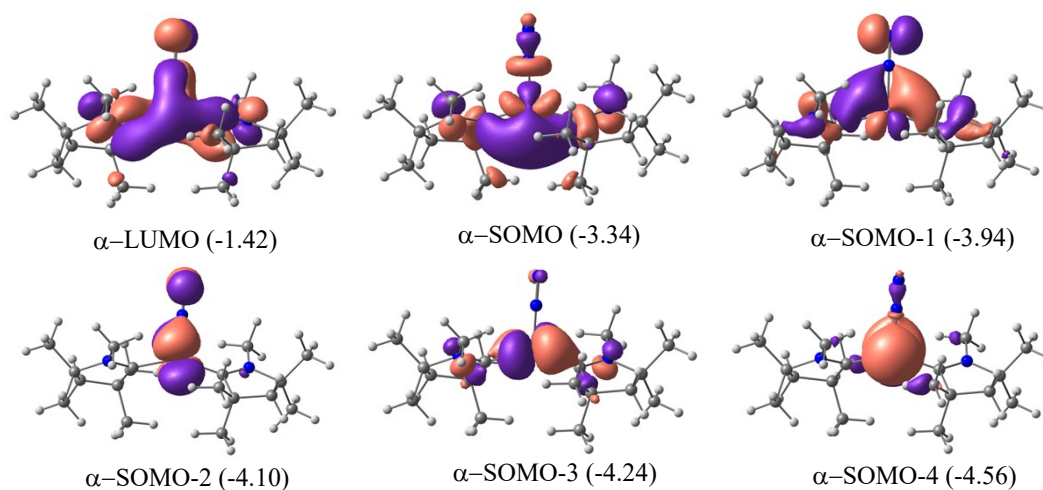

**Figure S2.** MO of complex **1** at BP86-D3(BJ)/Def2TZVPP level.

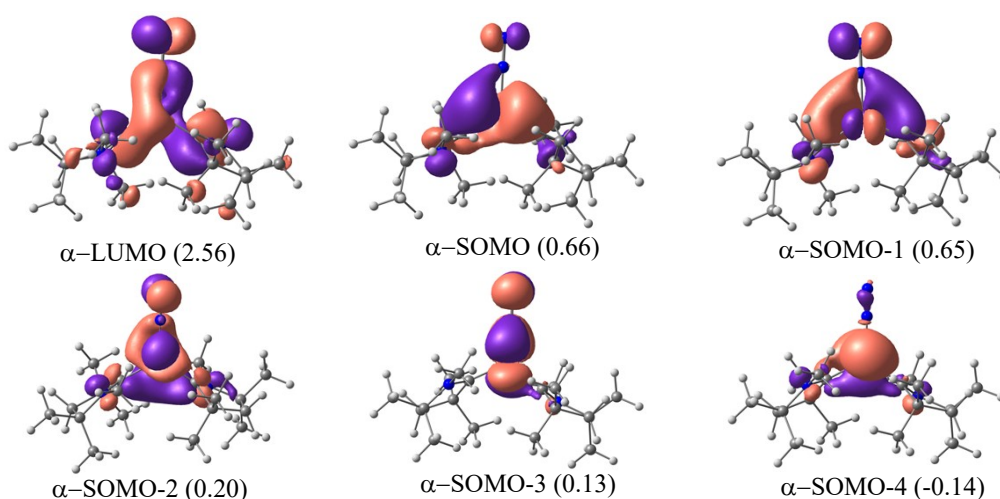

**Figure S3.** MO of complex **2** at BP86-D3(BJ)/Def2TZVPP level.

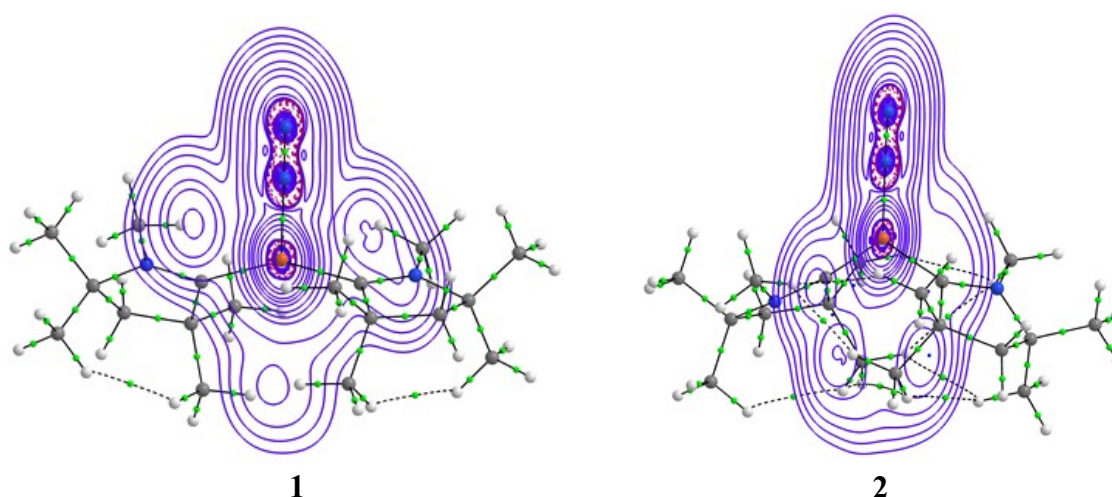

**Figure S4.** Contour plot of Laplacian distribution [ $\nabla^2\rho(r)$ ] in the complexes **1** and **2** in Fe–N–N plane. Solid blue lines indicate the areas of charge concentration ( $\nabla^2\rho(r) < 0$ ) while dotted purple lines denote charge depletion ( $\nabla^2\rho(r) > 0$ ). Solid lines connecting atomic nuclei (black) are the bond paths, small green spheres along the bond path are bond critical points (BCP) and

those thick solid blue lines separating the atomic basins indicates the zero-flux surface crossing the molecular plane.

### Optimized coordinates

Electronic energies in Hartree

(cAAC)<sub>2</sub>Fe–N<sub>2</sub> (**1**) Triplet

| Energy |              |              |              |   |              |              |              | -2189.7846483 |
|--------|--------------|--------------|--------------|---|--------------|--------------|--------------|---------------|
| 26     | 0.005479000  | 0.532642000  | -0.009758000 | 1 | -0.835642000 | -2.143134000 | -1.469981000 |               |
| 6      | 1.829153000  | -0.022710000 | 0.077095000  | 1 | -2.240170000 | -2.613966000 | -0.498070000 |               |
| 6      | -2.723525000 | 0.816627000  | 2.001471000  | 6 | 5.251935000  | 0.944641000  | 0.032122000  |               |
| 6      | -1.845580000 | 0.080710000  | -0.162490000 | 1 | 5.531529000  | 1.392953000  | -0.932153000 |               |
| 6      | 2.861947000  | 1.245026000  | -1.747128000 | 1 | 6.169576000  | 0.556323000  | 0.496408000  |               |
| 6      | 2.292727000  | -0.994166000 | 1.169440000  | 1 | 4.844864000  | 1.733317000  | 0.680043000  |               |
| 6      | -4.221535000 | -0.220037000 | 0.203953000  | 6 | 4.776412000  | -1.233576000 | -1.134530000 |               |
| 7      | -2.888336000 | 0.272402000  | 0.665158000  | 1 | 4.069944000  | -2.063582000 | -1.260908000 |               |
| 6      | 1.624358000  | -0.639627000 | 2.505641000  | 1 | 5.730846000  | -1.643084000 | -0.774064000 |               |
| 1      | 1.927319000  | -1.340224000 | 3.299480000  | 1 | 4.960020000  | -0.784468000 | -2.121416000 |               |
| 1      | 1.884748000  | 0.380566000  | 2.819264000  | 6 | -3.930760000 | -0.488380000 | -1.288554000 |               |
| 6      | -5.300669000 | 0.855173000  | 0.383736000  | 1 | -4.276851000 | 0.370662000  | -1.882332000 |               |
| 1      | -5.534944000 | 1.033755000  | 1.442874000  | 1 | -4.464135000 | -1.377518000 | -1.652804000 |               |
| 1      | -6.228777000 | 0.530905000  | -0.108035000 | 6 | -2.390546000 | -0.617750000 | -1.414677000 |               |
| 1      | -4.982559000 | 1.803256000  | -0.071662000 | 6 | 1.889913000  | -2.429192000 | 0.770932000  |               |
| 7      | 2.923031000  | 0.340760000  | -0.612290000 | 1 | 0.795586000  | -2.510210000 | 0.715099000  |               |
| 6      | 3.832670000  | -0.812429000 | 1.216079000  | 1 | 2.292312000  | -2.706700000 | -0.212894000 |               |
| 1      | 4.366869000  | -1.753528000 | 1.407656000  | 7 | 0.060194000  | 2.311782000  | 0.261636000  |               |
| 1      | 4.094516000  | -0.113834000 | 2.024525000  | 7 | 0.106194000  | 3.440510000  | 0.415391000  |               |
| 6      | -4.614925000 | -1.490388000 | 0.977307000  | 1 | -0.750499000 | 0.022220000  | -2.692766000 |               |
| 1      | -3.861794000 | -2.279148000 | 0.855319000  | 1 | -2.359968000 | -2.625098000 | -2.276933000 |               |
| 1      | -5.578881000 | -1.873626000 | 0.613391000  | 1 | 2.263641000  | -3.152077000 | 1.513679000  |               |
| 1      | -4.723459000 | -1.281119000 | 2.051370000  | 1 | 0.527040000  | -0.696666000 | 2.405487000  |               |
| 6      | -1.852076000 | 0.071321000  | -2.676911000 | 1 | -1.735668000 | 1.288707000  | 2.053662000  |               |
| 1      | -2.225988000 | -0.421677000 | -3.587979000 | 1 | -3.490825000 | 1.572528000  | 2.217879000  |               |
| 1      | -2.145486000 | 1.129747000  | -2.704480000 | 1 | -2.781768000 | 0.027280000  | 2.768970000  |               |
| 6      | 4.236568000  | -0.192068000 | -0.139936000 | 1 | 3.492066000  | 0.881265000  | -2.572465000 |               |
| 6      | -1.931740000 | -2.091016000 | -1.413572000 | 1 | 1.820978000  | 1.296487000  | -2.086869000 |               |

1 3.189569000 2.259873000 -1.474705000  
 (cAAC)<sub>2</sub>Fe–N<sub>2</sub> (1)-Triplet  
 Solvent: Diethyl ether  
 Energy: -2189.7926593  
 26 -0.006479000 0.596044000 -0.012762000  
 6 -1.829137000 -0.001862000 -0.101823000  
 6 2.722776000 0.733002000 -2.026498000  
 6 1.841994000 0.106154000 0.174166000  
 6 -2.870821000 1.298660000 1.697512000  
 6 -2.283672000 -1.023211000 -1.153117000  
 6 4.205605000 -0.272225000 -0.200190000  
 7 2.877565000 0.234528000 -0.669666000  
 6 -1.651813000 -0.706720000 -2.516218000  
 1 -1.974400000 -1.435447000 -3.276073000  
 1 -1.932185000 0.299439000 -2.857631000  
 6 5.306306000 0.769054000 -0.435581000  
 1 5.526805000 0.902228000 -1.504052000  
 1 6.232656000 0.438165000 0.054635000  
 1 5.019260000 1.740575000 -0.009601000  
 7 -2.920350000 0.363994000 0.585198000  
 6 -3.828182000 -0.881562000 -1.181539000  
 1 -4.339856000 -1.841850000 -1.332484000  
 1 -4.119350000 -0.217687000 -2.008842000  
 6 4.558027000 -1.581359000 -0.926428000  
 1 3.785738000 -2.345038000 -0.769009000  
 1 5.513462000 -1.973281000 -0.550465000  
 1 4.666225000 -1.417238000 -2.008038000  
 6 1.880451000 0.188693000 2.694323000  
 1 2.268838000 -0.278612000 3.612680000  
 1 2.198245000 1.240590000 2.678081000  
 6 -4.227852000 -0.225946000 0.157526000  
 6 1.886418000 -2.018270000 1.508141000  
 1 0.790720000 -2.044219000 1.588356000  
 1 2.166588000 -2.581306000 0.607507000

6 -5.280424000 0.872490000 -0.034027000  
 1 -5.557575000 1.343819000 0.919633000  
 1 -6.191552000 0.437051000 -0.467763000  
 1 -4.910940000 1.650020000 -0.717136000  
 6 -4.715183000 -1.245326000 1.200486000  
 1 -3.980242000 -2.046924000 1.346912000  
 1 -5.659659000 -1.698451000 0.868098000  
 1 -4.900220000 -0.764281000 2.171562000  
 6 3.922555000 -0.473410000 1.303285000  
 1 4.296173000 0.399121000 1.859278000  
 1 4.435435000 -1.361218000 1.697657000  
 6 2.380853000 -0.557446000 1.448924000  
 6 -1.840810000 -2.433946000 -0.711188000  
 1 -0.743954000 -2.493527000 -0.678266000  
 1 -2.217704000 -2.685196000 0.289580000  
 7 -0.040584000 2.353668000 -0.334750000  
 7 -0.069476000 3.482927000 -0.531500000  
 1 0.779627000 0.163513000 2.740908000  
 1 2.318985000 -2.529672000 2.382537000  
 1 -2.215783000 -3.188812000 -1.420173000  
 1 -0.552508000 -0.753051000 -2.449163000  
 1 1.717701000 1.159447000 -2.119039000  
 1 3.464352000 1.512699000 -2.247447000  
 1 2.836088000 -0.076507000 -2.764612000  
 1 -3.431284000 0.910030000 2.560185000  
 1 -1.821821000 1.435803000 1.983089000  
 1 -3.292030000 2.276236000 1.419431000  
 (cAAC)<sub>2</sub>Fe–N<sub>2</sub> (1) Singlet  
 Energy: -2189.7662743  
 26 -0.072374000 0.320858000 -0.158450000  
 6 -1.884390000 0.147438000 -0.016495000  
 6 2.658562000 1.585317000 -1.602763000  
 6 1.802738000 -0.076892000 -0.019568000  
 6 -3.130936000 1.985396000 1.042800000

|   |              |              |              |                                                   |              |              |              |
|---|--------------|--------------|--------------|---------------------------------------------------|--------------|--------------|--------------|
| 6 | -2.209590000 | -1.205998000 | -0.651213000 | 1                                                 | 4.023848000  | -0.198504000 | 1.985479000  |
| 6 | 4.207860000  | 0.158003000  | -0.147172000 | 1                                                 | 4.542012000  | -1.634530000 | 1.084994000  |
| 7 | 2.832616000  | 0.560585000  | -0.582249000 | 6                                                 | 2.382792000  | -1.146092000 | 0.912228000  |
| 6 | -1.218314000 | -1.394651000 | -1.814795000 | 6                                                 | -2.016856000 | -2.338578000 | 0.378349000  |
| 1 | -1.198501000 | -2.430523000 | -2.190303000 | 1                                                 | -0.965306000 | -2.402142000 | 0.691178000  |
| 1 | -1.437023000 | -0.713386000 | -2.645607000 | 1                                                 | -2.612802000 | -2.166482000 | 1.283348000  |
| 6 | 5.019845000  | 1.386018000  | 0.281271000  | 7                                                 | 0.112484000  | 1.900954000  | 0.447886000  |
| 1 | 5.270413000  | 2.031948000  | -0.572140000 | 7                                                 | 0.281259000  | 2.971260000  | 0.822365000  |
| 1 | 5.964379000  | 1.061242000  | 0.740164000  | 1                                                 | 0.592798000  | -1.326946000 | 2.139010000  |
| 1 | 4.462497000  | 1.979222000  | 1.019322000  | 1                                                 | 2.671514000  | -3.309708000 | 0.857674000  |
| 7 | -3.048250000 | 0.700619000  | 0.370497000  | 1                                                 | -2.311388000 | -3.308219000 | -0.055245000 |
| 6 | -3.690874000 | -1.061398000 | -1.067581000 | 1                                                 | -0.156059000 | -1.194363000 | -1.500125000 |
| 1 | -4.251727000 | -2.005552000 | -1.013056000 | 1                                                 | 1.580826000  | 1.713068000  | -1.763173000 |
| 1 | -3.749108000 | -0.695716000 | -2.103536000 | 1                                                 | 3.092356000  | 2.542144000  | -1.279960000 |
| 6 | 4.927745000  | -0.581983000 | -1.286214000 | 1                                                 | 3.132864000  | 1.280179000  | -2.547936000 |
| 1 | 4.363965000  | -1.468952000 | -1.603199000 | 1                                                 | -3.959686000 | 1.985093000  | 1.765789000  |
| 1 | 5.922992000  | -0.907520000 | -0.952244000 | 1                                                 | -2.192967000 | 2.163595000  | 1.575925000  |
| 1 | 5.067245000  | 0.069418000  | -2.160677000 | 1                                                 | -3.287358000 | 2.811055000  | 0.330108000  |
| 6 | 1.669299000  | -1.145817000 | 2.271346000  | (cAAC) <sub>2</sub> Fe–N <sub>2</sub> (1) Quintet |              |              |              |
| 1 | 2.088865000  | -1.923029000 | 2.930570000  | Energy: -2189.7512925                             |              |              |              |
| 1 | 1.773329000  | -0.169991000 | 2.764620000  | 26                                                | 0.006251000  | 0.724190000  | 0.240226000  |
| 6 | -4.284090000 | 0.014642000  | -0.116660000 | 6                                                 | 1.781918000  | -0.058004000 | 0.056901000  |
| 6 | 2.209041000  | -2.524484000 | 0.240128000  | 6                                                 | -2.886643000 | 1.520265000  | 1.537468000  |
| 1 | 1.143862000  | -2.766852000 | 0.121886000  | 6                                                 | -1.761364000 | -0.057253000 | 0.027048000  |
| 1 | 2.669876000  | -2.554853000 | -0.756906000 | 6                                                 | 2.845688000  | 1.850612000  | -1.092886000 |
| 6 | -5.173975000 | 1.001463000  | -0.885407000 | 6                                                 | 2.260868000  | -1.392880000 | 0.637653000  |
| 1 | -5.595245000 | 1.771772000  | -0.223897000 | 6                                                 | -4.184475000 | -0.095699000 | 0.043988000  |
| 1 | -6.013826000 | 0.462334000  | -1.346575000 | 7                                                 | -2.890546000 | 0.448946000  | 0.557244000  |
| 1 | -4.602682000 | 1.498496000  | -1.681687000 | 6                                                 | 1.479574000  | -1.807497000 | 1.890320000  |
| 6 | -5.073618000 | -0.586973000 | 1.057208000  | 1                                                 | 1.845058000  | -2.771109000 | 2.280453000  |
| 1 | -4.473345000 | -1.317959000 | 1.612383000  | 1                                                 | 1.580848000  | -1.048638000 | 2.679160000  |
| 1 | -5.980028000 | -1.090160000 | 0.690622000  | 6                                                 | -5.090452000 | 1.044453000  | -0.438847000 |
| 1 | -5.390428000 | 0.197976000  | 1.759165000  | 1                                                 | -5.430593000 | 1.677224000  | 0.393376000  |
| 6 | 3.879562000  | -0.758473000 | 1.050242000  | 1                                                 | -5.983184000 | 0.628575000  | -0.927573000 |

|   |              |              |              |                                                                    |              |              |              |
|---|--------------|--------------|--------------|--------------------------------------------------------------------|--------------|--------------|--------------|
| 1 | -4.562044000 | 1.676675000  | -1.165723000 | 1                                                                  | -2.252936000 | -3.384684000 | -0.809084000 |
| 7 | 2.893762000  | 0.586810000  | -0.383977000 | 1                                                                  | 2.534943000  | -3.442937000 | -0.083283000 |
| 6 | 3.754754000  | -1.130443000 | 0.965750000  | 1                                                                  | 0.408266000  | -1.907431000 | 1.666247000  |
| 1 | 4.380515000  | -2.024310000 | 0.832287000  | 1                                                                  | -1.944205000 | 1.468829000  | 2.103149000  |
| 1 | 3.842297000  | -0.819816000 | 2.017389000  | 1                                                                  | -2.948514000 | 2.511005000  | 1.062530000  |
| 6 | -4.895672000 | -0.906519000 | 1.139819000  | 1                                                                  | -3.732529000 | 1.408203000  | 2.230452000  |
| 1 | -4.269859000 | -1.737186000 | 1.489152000  | 1                                                                  | 3.734139000  | 1.961987000  | -1.729535000 |
| 1 | -5.836248000 | -1.321496000 | 0.750759000  | 1                                                                  | 1.947735000  | 1.869559000  | -1.722186000 |
| 1 | -5.145345000 | -0.276317000 | 2.005670000  | 1                                                                  | 2.799704000  | 2.711830000  | -0.404971000 |
| 6 | -1.386775000 | -1.169549000 | -2.213986000 | [(cAAC) <sub>2</sub> Fe(N <sub>2</sub> )] <sup>-</sup> (2) Doublet |              |              |              |
| 1 | -1.692019000 | -1.996691000 | -2.874355000 | Energy: -2189.8060501                                              |              |              |              |
| 1 | -1.554661000 | -0.220840000 | -2.743410000 | 26                                                                 | -0.000019000 | 1.287448000  | -0.048971000 |
| 6 | 4.208306000  | 0.029460000  | 0.053216000  | 6                                                                  | -1.496820000 | 0.238577000  | -0.256469000 |
| 6 | -1.917516000 | -2.545392000 | -0.180029000 | 6                                                                  | 2.421761000  | 0.543708000  | -1.988522000 |
| 1 | -0.847537000 | -2.674432000 | 0.023982000  | 6                                                                  | 1.595675000  | 0.432005000  | 0.310687000  |
| 1 | -2.446126000 | -2.600810000 | 0.781009000  | 6                                                                  | -2.357124000 | 0.541721000  | 2.004618000  |
| 6 | 5.001061000  | 1.084903000  | 0.838154000  | 6                                                                  | -1.898259000 | -0.618420000 | -1.471015000 |
| 1 | 5.319320000  | 1.918879000  | 0.196140000  | 6                                                                  | 3.553100000  | -0.917020000 | -0.247538000 |
| 1 | 5.905470000  | 0.630930000  | 1.268370000  | 7                                                                  | 2.604608000  | 0.150601000  | -0.613271000 |
| 1 | 4.393083000  | 1.488420000  | 1.659971000  | 6                                                                  | -1.636670000 | 0.112700000  | -2.790685000 |
| 6 | 5.026230000  | -0.446632000 | -1.158712000 | 1                                                                  | -1.922356000 | -0.503161000 | -3.662148000 |
| 1 | 4.488581000  | -1.218832000 | -1.722953000 | 1                                                                  | -2.192135000 | 1.060764000  | -2.820796000 |
| 1 | 5.985048000  | -0.867832000 | -0.823924000 | 6                                                                  | 4.983980000  | -0.578977000 | -0.693798000 |
| 1 | 5.251159000  | 0.385009000  | -1.842046000 | 1                                                                  | 5.086306000  | -0.601585000 | -1.789571000 |
| 6 | -3.691677000 | -0.969613000 | -1.128843000 | 1                                                                  | 5.696037000  | -1.310226000 | -0.279649000 |
| 1 | -3.834452000 | -0.422530000 | -2.072320000 | 1                                                                  | 5.263910000  | 0.422826000  | -0.338159000 |
| 1 | -4.257147000 | -1.908816000 | -1.203413000 | 7                                                                  | -2.383082000 | -0.179709000 | 0.753560000  |
| 6 | -2.174709000 | -1.203786000 | -0.897161000 | 6                                                                  | -3.406120000 | -0.893254000 | -1.250683000 |
| 6 | 2.117735000  | -2.488425000 | -0.442110000 | 1                                                                  | -3.725779000 | -1.877837000 | -1.629880000 |
| 1 | 1.061737000  | -2.648368000 | -0.694725000 | 1                                                                  | -3.993724000 | -0.131054000 | -1.785714000 |
| 1 | 2.637299000  | -2.210572000 | -1.368812000 | 6                                                                  | 3.141449000  | -2.276153000 | -0.853983000 |
| 7 | -0.217292000 | 2.509031000  | -0.190151000 | 1                                                                  | 2.108683000  | -2.527769000 | -0.582878000 |
| 7 | -0.379227000 | 3.604263000  | -0.455515000 | 1                                                                  | 3.802704000  | -3.084050000 | -0.501632000 |
| 1 | -0.308337000 | -1.253760000 | -2.017346000 | 1                                                                  | 3.203167000  | -2.243935000 | -1.952604000 |



|   |              |              |              | (cAAC) <sub>2</sub> Fe -Triplet |              |              |
|---|--------------|--------------|--------------|---------------------------------|--------------|--------------|
|   |              |              |              | Energy: -2080.1616961           |              |              |
| 6 | 2.035074000  | 0.640986000  | 2.790584000  |                                 |              |              |
| 1 | 2.339546000  | 0.128981000  | 3.721332000  |                                 |              |              |
| 1 | 2.726471000  | 1.474350000  | 2.599422000  | 26                              | -0.007807000 | -0.068795000 |
| 6 | -3.660833000 | -0.756243000 | 0.273734000  | 6                               | 1.896164000  | -0.016699000 |
| 6 | 1.014794000  | -1.460975000 | 1.892675000  | 6                               | -2.596519000 | -1.276628000 |
| 1 | -0.001380000 | -1.059797000 | 1.993862000  | 6                               | -1.889940000 | -0.060217000 |
| 1 | 0.978651000  | -2.189369000 | 1.072004000  | 6                               | 2.372462000  | -2.062862000 |
| 6 | -4.850067000 | 0.189853000  | 0.531242000  | 6                               | 2.709990000  | 1.133749000  |
| 1 | -5.065915000 | 0.293881000  | 1.605616000  | 6                               | -4.277594000 | -0.394627000 |
| 1 | -5.758266000 | -0.195110000 | 0.040982000  | 7                               | -2.873874000 | -0.622326000 |
| 1 | -4.630764000 | 1.187062000  | 0.123129000  | 6                               | 2.219067000  | 1.450893000  |
| 6 | -3.923626000 | -2.112050000 | 0.953255000  | 1                               | 2.815805000  | 2.259795000  |
| 1 | -3.110134000 | -2.815034000 | 0.729570000  | 1                               | 2.288144000  | 0.564175000  |
| 1 | -4.875109000 | -2.552727000 | 0.610830000  | 6                               | -5.072830000 | -1.707090000 |
| 1 | -3.980179000 | -1.993874000 | 2.046681000  | 1                               | -5.264283000 | -2.095182000 |
| 6 | 3.426142000  | -0.885557000 | 1.291879000  | 1                               | -6.048904000 | -1.539211000 |
| 1 | 4.190786000  | -0.200768000 | 1.692440000  | 1                               | -4.534635000 | -2.473200000 |
| 1 | 3.602728000  | -1.877007000 | 1.738703000  | 7                               | 2.789230000  | -0.895781000 |
| 6 | 2.011904000  | -0.323444000 | 1.595486000  | 6                               | 4.174708000  | 0.622112000  |
| 6 | -1.090754000 | -1.933861000 | -1.450671000 | 1                               | 4.901949000  | 1.412198000  |
| 1 | -0.021922000 | -1.709742000 | -1.571686000 | 1                               | 4.426078000  | 0.228853000  |
| 1 | -1.209470000 | -2.448742000 | -0.486647000 | 6                               | -4.976174000 | 0.616943000  |
| 7 | 0.013435000  | 3.058303000  | -0.254403000 | 1                               | -4.431695000 | 1.569227000  |
| 7 | 0.031549000  | 4.198335000  | -0.421811000 | 1                               | -5.999273000 | 0.813408000  |
| 1 | 1.034991000  | 1.074795000  | 2.940062000  | 1                               | -5.044776000 | 0.229095000  |
| 1 | 1.293806000  | -1.995105000 | 2.819440000  | 6                               | -1.900974000 | 0.325195000  |
| 1 | -1.410465000 | -2.617875000 | -2.258191000 | 1                               | -2.413036000 | 0.821508000  |
| 1 | -0.566826000 | 0.357239000  | -2.875835000 | 1                               | -1.904813000 | -0.759441000 |
| 1 | 1.895992000  | 1.512656000  | -1.979722000 | 6                               | 4.231994000  | -0.529330000 |
| 1 | 3.387175000  | 0.653660000  | -2.508068000 | 6                               | -2.492398000 | 2.184421000  |
| 1 | 1.794879000  | -0.168758000 | -2.562677000 | 1                               | -1.438901000 | 2.497930000  |
| 1 | -2.962116000 | 0.029771000  | 2.770651000  | 1                               | -2.946913000 | 2.476517000  |
| 1 | -1.316993000 | 0.590388000  | 2.361855000  | 6                               | 5.070465000  | -1.705790000 |
| 1 | -2.709021000 | 1.589231000  | 1.899223000  | 1                               | 5.131086000  | -2.523118000 |

|                                   |              |              |              |   |              |              |              |
|-----------------------------------|--------------|--------------|--------------|---|--------------|--------------|--------------|
| 1                                 | 6.096946000  | -1.368136000 | -0.527361000 | 1 | 2.576060000  | 3.422241000  | 1.106892000  |
| 1                                 | 4.647782000  | -2.101275000 | -1.259580000 | 1 | 2.513566000  | 2.952383000  | -0.623710000 |
| 6                                 | 4.757393000  | -0.080173000 | 1.566437000  | 6 | -5.443147000 | 0.300384000  | -0.915074000 |
| 1                                 | 4.176729000  | 0.766010000  | 1.955051000  | 1 | -5.573920000 | 1.237500000  | -1.477873000 |
| 1                                 | 5.809863000  | 0.228351000  | 1.489432000  | 1 | -6.324868000 | 0.177535000  | -0.266632000 |
| 1                                 | 4.702521000  | -0.899628000 | 2.297758000  | 1 | -5.414393000 | -0.534174000 | -1.630770000 |
| 6                                 | -4.046189000 | 0.153178000  | 1.188472000  | 7 | 2.945602000  | -0.294447000 | -0.925874000 |
| 1                                 | -4.168975000 | -0.666283000 | 1.912565000  | 6 | 3.975177000  | 0.994470000  | 0.710964000  |
| 1                                 | -4.775692000 | 0.933370000  | 1.448159000  | 1 | 4.424215000  | 0.937143000  | 1.714771000  |
| 6                                 | -2.581730000 | 0.662192000  | 1.228304000  | 1 | 4.482871000  | 1.808241000  | 0.168556000  |
| 6                                 | 2.533801000  | 2.387564000  | 0.047301000  | 6 | -4.159128000 | 1.548587000  | 0.856467000  |
| 1                                 | 1.473525000  | 2.677547000  | 0.076172000  | 1 | -3.206361000 | 1.606635000  | 1.400671000  |
| 1                                 | 2.853731000  | 2.206674000  | 1.082555000  | 1 | -4.984382000 | 1.496103000  | 1.584030000  |
| 1                                 | -0.852413000 | 0.662326000  | 2.556734000  | 1 | -4.274494000 | 2.478603000  | 0.278638000  |
| 1                                 | -3.004919000 | 2.730745000  | 1.801970000  | 6 | -2.124382000 | -2.718031000 | 0.380334000  |
| 1                                 | 3.122725000  | 3.227507000  | -0.355392000 | 1 | -2.572106000 | -3.421821000 | 1.107451000  |
| 1                                 | 1.166166000  | 1.772123000  | -2.231269000 | 1 | -2.509861000 | -2.952018000 | -0.623183000 |
| 1                                 | -1.535817000 | -1.564118000 | -1.948524000 | 6 | 4.159519000  | -0.318673000 | -0.074831000 |
| 1                                 | -3.209239000 | -2.181431000 | -2.067906000 | 6 | -1.839657000 | -0.966415000 | 2.136114000  |
| 1                                 | -2.782436000 | -0.609708000 | -2.805675000 | 1 | -0.744797000 | -1.066242000 | 2.081107000  |
| 1                                 | 2.515668000  | -1.918699000 | 2.125425000  | 1 | -2.057218000 | 0.060076000  | 2.463612000  |
| 1                                 | 1.302867000  | -2.221197000 | 0.842907000  | 6 | 5.442719000  | -0.303725000 | -0.914835000 |
| 1                                 | 2.930458000  | -2.958316000 | 0.730913000  | 1 | 5.572425000  | -1.241009000 | -1.477601000 |
| [(cAAC) <sub>2</sub> Fe]- Doublet |              |              |              | 1 | 6.324430000  | -0.182022000 | -0.266163000 |
| Energy: -2080.1666907             |              |              |              | 1 | 5.415233000  | 0.530875000  | -1.630534000 |
| 26                                | -0.000039000 | 0.001250000  | -0.565126000 | 6 | 4.156542000  | -1.550279000 | 0.856326000  |
| 6                                 | 1.845617000  | 0.317141000  | -0.317283000 | 1 | 3.203504000  | -1.607085000 | 1.400189000  |
| 6                                 | -2.712234000 | 1.387665000  | -1.846815000 | 1 | 4.981615000  | -1.498910000 | 1.584173000  |
| 6                                 | -1.845399000 | -0.315877000 | -0.316813000 | 1 | 4.270876000  | -2.480425000 | 0.278501000  |
| 6                                 | 2.710610000  | -1.387328000 | -1.847297000 | 6 | -3.974282000 | -0.995908000 | 0.711068000  |
| 6                                 | 2.441566000  | 1.256849000  | 0.748040000  | 1 | -4.480798000 | -1.810339000 | 0.168550000  |
| 6                                 | -4.160179000 | 0.317008000  | -0.074747000 | 1 | -4.423610000 | -0.939175000 | 1.714779000  |
| 7                                 | -2.946041000 | 0.294451000  | -0.925483000 | 6 | -2.440340000 | -1.256291000 | 0.748455000  |
| 6                                 | 2.127574000  | 2.718969000  | 0.379743000  | 6 | 1.840270000  | 0.967862000  | 2.135619000  |

|                                                               |              |              |              |   |              |              |              |
|---------------------------------------------------------------|--------------|--------------|--------------|---|--------------|--------------|--------------|
| 1                                                             | 0.745537000  | 1.069004000  | 2.080418000  | 6 | -3.865199000 | -0.690237000 | -1.269987000 |
| 1                                                             | 2.056531000  | -0.058856000 | 2.463266000  | 1 | -4.405429000 | -1.604750000 | -1.533147000 |
| 1                                                             | -1.033591000 | -2.862652000 | 0.360451000  | 1 | -4.126533000 | 0.074143000  | -2.009674000 |
| 1                                                             | -2.234828000 | -1.669552000 | 2.893159000  | 6 | 4.673755000  | -1.366653000 | -1.093476000 |
| 1                                                             | 2.236168000  | 1.670599000  | 2.892658000  | 1 | 3.940027000  | -2.175420000 | -1.058397000 |
| 1                                                             | 1.036980000  | 2.865010000  | 0.359633000  | 1 | 5.638028000  | -1.758021000 | -0.753373000 |
| 1                                                             | -1.863288000 | 1.108530000  | -2.487395000 | 1 | 4.790053000  | -1.050505000 | -2.135377000 |
| 1                                                             | -3.601991000 | 1.574641000  | -2.471657000 | 6 | 1.833292000  | -0.211279000 | 2.654008000  |
| 1                                                             | -2.428974000 | 2.329107000  | -1.332628000 | 1 | 2.192154000  | -0.792435000 | 3.512114000  |
| 1                                                             | 2.425777000  | -2.328356000 | -1.333218000 | 1 | 2.120459000  | 0.835169000  | 2.793618000  |
| 1                                                             | 1.862326000  | -1.107006000 | -2.488230000 | 6 | -4.251688000 | -0.185491000 | 0.136511000  |
| 1                                                             | 3.600374000  | -1.575568000 | -2.471748000 | 6 | 1.957268000  | -2.236772000 | 1.187663000  |
| N <sub>2</sub> Singlet                                        |              |              |              | 1 | 0.865604000  | -2.301648000 | 1.222420000  |
| Energy: -109.5749788                                          |              |              |              | 1 | 2.285579000  | -2.662325000 | 0.234960000  |
| 7                                                             | 0.000000000  | 0.000000000  | 0.551559000  | 6 | -5.256710000 | 0.971812000  | 0.073862000  |
| 7                                                             | 0.000000000  | 0.000000000  | -0.551559000 | 1 | -5.514333000 | 1.337633000  | 1.073336000  |
| (cAAC) <sub>2</sub> Fe–N <sub>2</sub> (1) Triplet-TPSS-D3(BJ) |              |              |              | 1 | -6.180452000 | 0.631535000  | -0.405059000 |
| Energy: -2189.7800793                                         |              |              |              | 1 | -4.849834000 | 1.802910000  | -0.510047000 |
| 26                                                            | -0.004173000 | 0.510259000  | 0.039812000  | 6 | -4.793927000 | -1.301728000 | 1.044938000  |
| 6                                                             | -1.843106000 | -0.019382000 | -0.084226000 | 1 | -4.098743000 | -2.143236000 | 1.091105000  |
| 6                                                             | 2.755276000  | 1.018638000  | -1.906154000 | 1 | -5.753138000 | -1.664211000 | 0.661189000  |
| 6                                                             | 1.855974000  | 0.044788000  | 0.155236000  | 1 | -4.959628000 | -0.934404000 | 2.063219000  |
| 6                                                             | -2.850276000 | 1.096187000  | 1.851474000  | 6 | 3.937733000  | -0.606333000 | 1.247488000  |
| 6                                                             | -2.327614000 | -0.886630000 | -1.250668000 | 1 | 4.263628000  | 0.189900000  | 1.925466000  |
| 6                                                             | 4.241940000  | -0.186915000 | -0.205576000 | 1 | 4.474642000  | -1.518553000 | 1.524923000  |
| 7                                                             | 2.905742000  | 0.322457000  | -0.637067000 | 6 | 2.398689000  | -0.765323000 | 1.337548000  |
| 6                                                             | -1.663065000 | -0.423960000 | -2.555913000 | 6 | -1.933060000 | -2.354749000 | -0.984255000 |
| 1                                                             | -1.966344000 | -1.056227000 | -3.399166000 | 1 | -0.843341000 | -2.444865000 | -0.948962000 |
| 1                                                             | -1.925256000 | 0.613704000  | -2.782571000 | 1 | -2.328040000 | -2.711603000 | -0.028666000 |
| 6                                                             | 5.297715000  | 0.924326000  | -0.267195000 | 7 | -0.049098000 | 2.314232000  | -0.072463000 |
| 1                                                             | 5.521889000  | 1.216634000  | -1.298196000 | 7 | -0.085170000 | 3.448763000  | -0.126910000 |
| 1                                                             | 6.228518000  | 0.569251000  | 0.186598000  | 1 | 0.736467000  | -0.267212000 | 2.640406000  |
| 1                                                             | 4.959134000  | 1.806928000  | 0.283796000  | 1 | 2.377504000  | -2.842438000 | 2.000335000  |
| 7                                                             | -2.929681000 | 0.293688000  | 0.640030000  | 1 | -2.318934000 | -3.001562000 | -1.782075000 |

|                                                                                |              |              |              |                                                             |              |              |              |
|--------------------------------------------------------------------------------|--------------|--------------|--------------|-------------------------------------------------------------|--------------|--------------|--------------|
| 1                                                                              | -0.570292000 | -0.488787000 | -2.459399000 | 1                                                           | 2.814975000  | 1.728320000  | 2.405170000  |
| 1                                                                              | 1.720576000  | 1.356506000  | -1.975759000 | 6                                                           | -3.727344000 | -0.682217000 | 0.353352000  |
| 1                                                                              | 3.419366000  | 1.886845000  | -1.957533000 | 6                                                           | 1.147426000  | -1.287826000 | 2.055600000  |
| 1                                                                              | 2.977250000  | 0.354198000  | -2.750204000 | 1                                                           | 0.133429000  | -0.891297000 | 2.147699000  |
| 1                                                                              | -3.444409000 | 0.644744000  | 2.653456000  | 1                                                           | 1.102335000  | -2.094847000 | 1.319357000  |
| 1                                                                              | -1.803385000 | 1.139119000  | 2.155711000  | 6                                                           | -4.868706000 | 0.332833000  | 0.558253000  |
| 1                                                                              | -3.208815000 | 2.116494000  | 1.677048000  | 1                                                           | -5.052011000 | 0.525901000  | 1.621780000  |
| [(cAAC) <sub>2</sub> Fe(N <sub>2</sub> )] <sup>-</sup> (2) Doublet-TPSS-D3(BJ) |              |              |              | 1                                                           | -5.798904000 | -0.049228000 | 0.119451000  |
| Energy: -2189.7912104                                                          |              |              |              | 1                                                           | -4.617705000 | 1.280426000  | 0.071205000  |
| 26                                                                             | 0.002485000  | 1.208200000  | -0.147190000 | 6                                                           | -4.042384000 | -1.971749000 | 1.132266000  |
| 6                                                                              | -1.524452000 | 0.174539000  | -0.265976000 | 1                                                           | -3.269919000 | -2.723649000 | 0.949837000  |
| 6                                                                              | 2.422549000  | 0.374888000  | -2.044060000 | 1                                                           | -5.015180000 | -2.385837000 | 0.834272000  |
| 6                                                                              | 1.638152000  | 0.438704000  | 0.269310000  | 1                                                           | -4.076383000 | -1.771044000 | 2.209886000  |
| 6                                                                              | -2.346254000 | 0.673140000  | 1.976877000  | 6                                                           | 3.528973000  | -0.731939000 | 1.326217000  |
| 6                                                                              | -1.983376000 | -0.747382000 | -1.408780000 | 1                                                           | 4.285440000  | -0.003381000 | 1.643307000  |
| 6                                                                              | 3.622528000  | -0.900131000 | -0.204861000 | 1                                                           | 3.731576000  | -1.672290000 | 1.853674000  |
| 7                                                                              | 2.653685000  | 0.122110000  | -0.640043000 | 6                                                           | 2.110779000  | -0.170224000 | 1.608617000  |
| 6                                                                              | -1.702010000 | -0.128120000 | -2.780842000 | 6                                                           | -1.236712000 | -2.094645000 | -1.298107000 |
| 1                                                                              | -2.005559000 | -0.798907000 | -3.598420000 | 1                                                           | -0.166262000 | -1.931983000 | -1.454549000 |
| 1                                                                              | -2.229321000 | 0.825290000  | -2.885362000 | 1                                                           | -1.362262000 | -2.523290000 | -0.298728000 |
| 6                                                                              | 5.036496000  | -0.586884000 | -0.716451000 | 7                                                           | -0.021929000 | 2.955876000  | -0.496422000 |
| 1                                                                              | 5.104442000  | -0.692878000 | -1.805469000 | 7                                                           | -0.027054000 | 4.075564000  | -0.752789000 |
| 1                                                                              | 5.763381000  | -1.276686000 | -0.270030000 | 1                                                           | 1.142453000  | 1.341549000  | 2.822494000  |
| 1                                                                              | 5.313968000  | 0.437294000  | -0.447819000 | 1                                                           | 1.464674000  | -1.712962000 | 3.020604000  |
| 7                                                                              | -2.419378000 | -0.133558000 | 0.778172000  | 1                                                           | -1.604768000 | -2.818526000 | -2.041972000 |
| 6                                                                              | -3.498922000 | -0.937247000 | -1.158127000 | 1                                                           | -0.629559000 | 0.075114000  | -2.879732000 |
| 1                                                                              | -3.864121000 | -1.927329000 | -1.460655000 | 1                                                           | 1.866762000  | 1.318001000  | -2.110183000 |
| 1                                                                              | -4.056605000 | -0.191357000 | -1.736818000 | 1                                                           | 3.368881000  | 0.466081000  | -2.591370000 |
| 6                                                                              | 3.212141000  | -2.311542000 | -0.677093000 | 1                                                           | 1.812906000  | -0.409763000 | -2.523885000 |
| 1                                                                              | 2.189688000  | -2.539246000 | -0.367753000 | 1                                                           | -2.921075000 | 0.215698000  | 2.792641000  |
| 1                                                                              | 3.883422000  | -3.074272000 | -0.262603000 | 1                                                           | -1.295705000 | 0.737704000  | 2.280499000  |
| 1                                                                              | 3.258425000  | -2.378268000 | -1.770413000 | 1                                                           | -2.703592000 | 1.704984000  | 1.815522000  |
| 6                                                                              | 2.143414000  | 0.914291000  | 2.697014000  | (cAAC) <sub>2</sub> Fe–N <sub>2</sub> (1) Triplet-PW6B95-D3 |              |              |              |
| 1                                                                              | 2.476481000  | 0.506589000  | 3.663605000  | Energy: -2191.3578227                                       |              |              |              |

|    |              |              |              |                                                                               |              |              |              |
|----|--------------|--------------|--------------|-------------------------------------------------------------------------------|--------------|--------------|--------------|
| 26 | 0.002869000  | 1.214660000  | 0.308781000  | 6                                                                             | -3.823172000 | -2.336810000 | 0.275026000  |
| 6  | -1.642747000 | 0.283226000  | -0.089658000 | 1                                                                             | -2.928541000 | -2.835449000 | -0.080349000 |
| 6  | 2.533718000  | 0.954272000  | -1.811652000 | 1                                                                             | -4.682145000 | -2.772542000 | -0.228626000 |
| 6  | 1.695041000  | 0.260446000  | 0.347057000  | 1                                                                             | -3.927166000 | -2.541358000 | 1.337979000  |
| 6  | -2.602626000 | -0.055912000 | 2.113985000  | 6                                                                             | 3.498868000  | -1.171629000 | 1.061572000  |
| 6  | -1.977558000 | -0.132777000 | -1.512825000 | 1                                                                             | 4.193684000  | -0.606508000 | 1.678893000  |
| 6  | 3.714529000  | -0.790463000 | -0.404356000 | 1                                                                             | 3.689978000  | -2.227038000 | 1.235658000  |
| 7  | 2.654294000  | 0.214512000  | -0.584890000 | 6                                                                             | 2.056937000  | -0.766306000 | 1.406226000  |
| 6  | -1.689803000 | 0.985268000  | -2.503039000 | 6                                                                             | -1.124102000 | -1.349101000 | -1.886561000 |
| 1  | -1.918557000 | 0.676251000  | -3.521579000 | 1                                                                             | -0.074452000 | -1.069291000 | -1.923424000 |
| 1  | -2.268523000 | 1.873974000  | -2.269927000 | 1                                                                             | -1.218546000 | -2.144603000 | -1.154114000 |
| 6  | 5.095197000  | -0.187119000 | -0.619647000 | 7                                                                             | -0.005149000 | 3.109830000  | 0.433603000  |
| 1  | 5.277424000  | 0.055954000  | -1.663080000 | 7                                                                             | -0.011007000 | 4.213155000  | 0.551816000  |
| 1  | 5.855472000  | -0.901786000 | -0.316112000 | 1                                                                             | 0.926717000  | 0.158205000  | 2.990428000  |
| 1  | 5.215100000  | 0.713556000  | -0.024665000 | 1                                                                             | 1.376656000  | -2.714773000 | 2.052775000  |
| 7  | -2.602998000 | -0.230971000 | 0.687599000  | 1                                                                             | -1.420944000 | -1.736554000 | -2.860375000 |
| 6  | -3.469601000 | -0.491130000 | -1.449850000 | 1                                                                             | -0.633977000 | 1.255136000  | -2.466724000 |
| 1  | -3.734640000 | -1.305571000 | -2.118809000 | 1                                                                             | 2.045553000  | 1.901435000  | -1.596631000 |
| 1  | -4.060455000 | 0.375590000  | -1.737823000 | 1                                                                             | 3.508987000  | 1.153774000  | -2.243363000 |
| 6  | 3.512107000  | -1.952917000 | -1.371353000 | 1                                                                             | 1.932173000  | 0.419992000  | -2.548953000 |
| 1  | 2.535201000  | -2.406976000 | -1.244627000 | 1                                                                             | -3.109222000 | -0.883665000 | 2.602886000  |
| 1  | 4.269936000  | -2.715587000 | -1.212793000 | 1                                                                             | -1.574272000 | -0.026390000 | 2.462758000  |
| 1  | 3.595432000  | -1.611417000 | -2.400782000 | 1                                                                             | -3.093790000 | 0.871361000  | 2.410420000  |
| 6  | 1.950302000  | -0.161832000 | 2.799337000  | [(cAAC) <sub>2</sub> Fe(N <sub>2</sub> )] <sup>-</sup> (2) Doublet- PW6B95-D3 |              |              |              |
| 1  | 2.222002000  | -0.888827000 | 3.562784000  | Energy: -2191.3543137                                                         |              |              |              |
| 1  | 2.596141000  | 0.705599000  | 2.900004000  | 26                                                                            | 0.021293000  | 1.249235000  | -0.138920000 |
| 6  | -3.764401000 | -0.835989000 | 0.012631000  | 6                                                                             | -1.610456000 | 0.220896000  | -0.296586000 |
| 6  | 1.100718000  | -1.958388000 | 1.319017000  | 6                                                                             | 2.582321000  | 0.524105000  | -1.966503000 |
| 1  | 0.080874000  | -1.634246000 | 1.506535000  | 6                                                                             | 1.719826000  | 0.419936000  | 0.285857000  |
| 1  | 1.115157000  | -2.415754000 | 0.335031000  | 6                                                                             | -2.440803000 | 0.660731000  | 1.943832000  |
| 6  | -5.056032000 | -0.187485000 | 0.492221000  | 6                                                                             | -2.013785000 | -0.701009000 | -1.431484000 |
| 1  | -5.254752000 | -0.417820000 | 1.536242000  | 6                                                                             | 3.649928000  | -0.905756000 | -0.213145000 |
| 1  | -5.894550000 | -0.555484000 | -0.092828000 | 7                                                                             | 2.777491000  | 0.207717000  | -0.582197000 |
| 1  | -5.006784000 | 0.891857000  | 0.379202000  | 6                                                                             | -1.757582000 | -0.083114000 | -2.795089000 |

|   |              |              |              |   |              |              |              |
|---|--------------|--------------|--------------|---|--------------|--------------|--------------|
| 1 | -2.034491000 | -0.765218000 | -3.601183000 | 1 | -0.157937000 | -1.787841000 | -1.472298000 |
| 1 | -2.315843000 | 0.842616000  | -2.906537000 | 1 | -1.318602000 | -2.436031000 | -0.329665000 |
| 6 | 5.095439000  | -0.637110000 | -0.607760000 | 7 | 0.008142000  | 3.102280000  | -0.337599000 |
| 1 | 5.219749000  | -0.625317000 | -1.688542000 | 7 | 0.018267000  | 4.229163000  | -0.458365000 |
| 1 | 5.746526000  | -1.414071000 | -0.211372000 | 1 | 1.124888000  | 1.109478000  | 2.873812000  |
| 1 | 5.417496000  | 0.322344000  | -0.212645000 | 1 | 1.273314000  | -1.878001000 | 2.839673000  |
| 7 | -2.477599000 | -0.105621000 | 0.733405000  | 1 | -1.540005000 | -2.735061000 | -2.062421000 |
| 6 | -3.508525000 | -0.953805000 | -1.183115000 | 1 | -0.701272000 | 0.160652000  | -2.890479000 |
| 1 | -3.828055000 | -1.949247000 | -1.489621000 | 1 | 2.114876000  | 1.503885000  | -2.029157000 |
| 1 | -4.091504000 | -0.234261000 | -1.755346000 | 1 | 3.528923000  | 0.547510000  | -2.503803000 |
| 6 | 3.185834000  | -2.213217000 | -0.857905000 | 1 | 1.911871000  | -0.186728000 | -2.466027000 |
| 1 | 2.133201000  | -2.384544000 | -0.658748000 | 1 | -2.974572000 | 0.149813000  | 2.744986000  |
| 1 | 3.756196000  | -3.059284000 | -0.479346000 | 1 | -1.403545000 | 0.791283000  | 2.243084000  |
| 1 | 3.318983000  | -2.174864000 | -1.937515000 | 1 | -2.868921000 | 1.662064000  | 1.821168000  |
| 6 | 2.109401000  | 0.665008000  | 2.745904000  |   |              |              |              |
| 1 | 2.394409000  | 0.163659000  | 3.673677000  |   |              |              |              |
| 1 | 2.810170000  | 1.473320000  | 2.553726000  |   |              |              |              |
| 6 | -3.742306000 | -0.717421000 | 0.315465000  |   |              |              |              |
| 6 | 1.052188000  | -1.398245000 | 1.883502000  |   |              |              |              |
| 1 | 0.055438000  | -0.966981000 | 1.919341000  |   |              |              |              |
| 1 | 1.033796000  | -2.163781000 | 1.114145000  |   |              |              |              |
| 6 | -4.921340000 | 0.229667000  | 0.531384000  |   |              |              |              |
| 1 | -5.111471000 | 0.397059000  | 1.589815000  |   |              |              |              |
| 1 | -5.825113000 | -0.185669000 | 0.089647000  |   |              |              |              |
| 1 | -4.717517000 | 1.189203000  | 0.063010000  |   |              |              |              |
| 6 | -3.988572000 | -2.011892000 | 1.084835000  |   |              |              |              |
| 1 | -3.192812000 | -2.724575000 | 0.893486000  |   |              |              |              |
| 1 | -4.937377000 | -2.462594000 | 0.796332000  |   |              |              |              |
| 1 | -4.021483000 | -1.819875000 | 2.155748000  |   |              |              |              |
| 6 | 3.475103000  | -0.905440000 | 1.305679000  |   |              |              |              |
| 1 | 4.238554000  | -0.263475000 | 1.743048000  |   |              |              |              |
| 1 | 3.599887000  | -1.900455000 | 1.729706000  |   |              |              |              |
| 6 | 2.080735000  | -0.309206000 | 1.571959000  |   |              |              |              |
| 6 | -1.213323000 | -2.002446000 | -1.320912000 |   |              |              |              |
